# Supplementary material for: Photochemical synthesis of bimetallic CuNiSxquantum dots onto g-C3N4as a cocatalyst for high hydrogen evolution
Source: Royal Society of Chemistry journal article supplement (doi:10.1039/d2nj03115a), 2022-01-01
Supplement: d2nj03115a1.pdf [file d2nj03115a1.pdf]

## Supporting Information

### **Photochemical synthesis of bimetallic CuNiS<sub>x</sub> quantum dots onto g-C<sub>3</sub>N<sub>4</sub> as cocatalyst for high hydrogen evolution**

Xiaobo Wu,<sup>a</sup> Huiqing Fan,<sup>\*a</sup> Weijia Wang,<sup>a</sup> Mingchang Zhang,<sup>c</sup> Mohammed Al-Bahrani,<sup>d</sup> and Longtao Ma<sup>\*b</sup>

<sup>a</sup> *State Key Laboratory of Solidification Processing, School of Materials Science and Engineering, Northwestern Polytechnical University, Xi'an, 710072 (P. R. China)*

<sup>b</sup> *Frontiers Science Center for Flexible Electronics, Institute of Flexible Electronics, Northwestern Polytechnical University, Xi'an, 710072 (P. R. China)*

<sup>c</sup> *Institute of Science and Technology for New Energy, Xi'an Technological University, Xi'an, 710021 (P. R. China)*

<sup>d</sup> *Air Conditioning and Refrigeration Techniques Engineering Department, Al-Mustaqbal University College, Babylon, 51001, Iraq*

*Corresponding authors: Prof. Huiqing Fan, hqfan@nwpu.edu.cn*

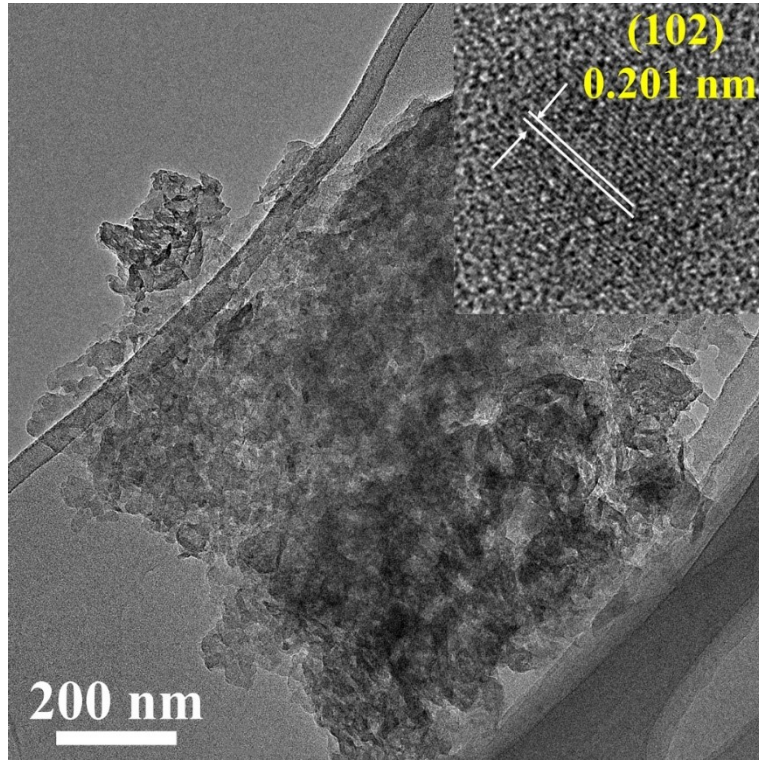

**Fig. S1** TEM and HRTEM images of CN/NiS<sub>x</sub> QDs.

**Table S1** Fitting data results of CN/NiS<sub>x</sub> QDs and CN/CuNiS<sub>x</sub> QDs.

| Sample                    | R <sub>s</sub> (Ω) | R <sub>ct</sub> (Ω) |
|---------------------------|--------------------|---------------------|
| CN/NiS <sub>x</sub> QDs   | 3.148              | 1753                |
| CN/CuNiS <sub>x</sub> QDs | 3.159              | 944                 |

**Table S2** AQE of CN/NiS<sub>x</sub> QDs and CN/CuNiS<sub>x</sub> QDs under monochromatic lights with different wavelengths.

| Sample                    | λ (nm) - AQE (%) |      |      |     |
|---------------------------|------------------|------|------|-----|
|                           | 420              | 450  | 500  | 550 |
| CN/NiS <sub>x</sub> QDs   | 1.33             | 0.38 | 0    | 0   |
| CN/CuNiS <sub>x</sub> QDs | 3.21             | 0.97 | 0.23 | 0   |

**Table S3** The comparison of photocatalytic hydrogen performance of the CN/CuNiS<sub>x</sub> QDs with other cocatalysts based g-C<sub>3</sub>N<sub>4</sub> photocatalysts.

| <b>Photocatalyst</b>                   | <b>Method</b>   | <b>HER<br/>(<math>\mu\text{mol}\cdot\text{h}^{-1}\text{g}^{-1}</math>)</b> | <b>Ref</b> |
|----------------------------------------|-----------------|----------------------------------------------------------------------------|------------|
| CN/CuNiS <sub>x</sub> QDs              | Photochemical   | 1061                                                                       | This work  |
| NiS/CN                                 | Photodeposition | 244                                                                        | 1          |
| Ni <sub>x</sub> /Co <sub>1-x</sub> /CN | Hydrothermal    | 1420                                                                       | 2          |
| NiS-CuS/CN                             | Hydrothermal    | 1602                                                                       | 3          |
| C/NiS/CN                               | Coupled         | 366.4                                                                      | 4          |
| Ni/NiS/CN                              | Three-step      | 515                                                                        | 5          |
| CuS/NT                                 | Sonochemical    | 348                                                                        | 6          |
| PtNi <sub>x</sub> /CN                  | Sulfidization   | 4966                                                                       | 7          |

## References

- 1 M. Wang, J. Cheng, X. Wang, X. Hong, J. Fan and H. Yu, *Chinese J. Catal.*, 2021, **42**, 37-45.
- 2 Y. Gao, F. Chen, Z. Chen and H. Shi, *J. Mater. Sci. Technol.*, 2020, **56**, 227-235.
- 3 Y. Xu, C. Du, C. Zhou and S. Yang, *Int. J. Hydrogen Energy*, 2020, **45**, 4084-4094.
- 4 J. Wen, J. Xie, Z. Yang, R. Shen, H. Li, X. Luo, X. Chen and X. Li, *ACS Sustain. Chem. Eng.*, 2017, **5**, 2224-2236.
- 5 J. Wen, J. Xie, H. Zhang, A. Zhang, Y. Liu, X. Chen and X. Li, *ACS Appl. Mater. Inter.*, 2017, **9**, 14031-14042.
- 6 R. Shen, J. Xie, P. Guo, L. Chen, X. Chen and X. Li, *ACS Appl. Energ. Mater.*, 2018, **1**, 2232-2241.
- 7 L. Bi, R. Zhang, K. Zhang, Y. Lin, D. Wang, X. Zou and T. Xie, *ACS Sustain. Chem. Eng.*, 2019, **7**, 15137-15145.
